# Supplementary material for: Populus euphratica Glycine-Rich RNA-Binding Protein 2 Interacts with Target mRNAs to Negatively Regulate Salt Tolerance in Poplar
Source: Preprints.org preprint supplement (doi:10.20944/preprints202312.1784.v1), 2023-12-26
Supplement: Supplementary file 1 [file supplementary]

**Supplemental Table S1** Accession numbers of GRP orthologs used for multiple sequence alignment and phylogenetic analysis.

| GRPs             | Accession number |
|------------------|------------------|
| <i>PeGRP2</i>    | XP_011046516.1   |
| <i>PtGRP2</i>    | XP_024463774.1   |
| <i>GmGRP2</i>    | XP_003540832.1   |
| <i>MdGRP2</i>    | XP_008338784.2   |
| <i>OsGRP2</i>    | XP_015649739.1   |
| <i>ZmGRP2</i>    | ACN27139.1       |
| <i>NtGRP2</i>    | XP_016516220.1   |
| <i>CsGRP2</i>    | XP_010428999.1   |
| <i>AtGRP2</i>    | NP_179702.1      |
| <i>SbGR-RNP</i>  | AAG23220.1       |
| <i>OsGRP3</i>    | BAS81800.1       |
| <i>AtGRP7</i>    | NP_179760.1      |
| <i>MhGR-RBP1</i> | HM042682.1       |
| <i>ZjGRP</i>     | AIN39847.1       |
| <i>AtGR-RBP4</i> | NP_189025.1      |
| <i>LbGRP1</i>    | ACV33079.1       |

**Supplemental Table S2** Primers used for qRT-PCR.

| <i>Gene name</i>     | <i>Primer sequences (5'-3')</i> |                              |
|----------------------|---------------------------------|------------------------------|
| <i>PcGRP2</i>        | F: ATTACAGTGACGAGGACCACC        | R: GGAAGGGACAAACGGAGACT      |
| <i>PcActin7</i>      | F: ATTGGCCTTGGGGTTAAGAG         | R: CACACTGGAGTGATGGTTGG      |
| <i>PcUBQ</i>         | F: AGACCTACACCAAGCCCAAGAAGAT    | R: CCAGCACCCGACTCAGCATTAG    |
| <i>PcPETC</i>        | F: ATTTCTTTGTCCCTTCTGGAC        | R: GTTCCATGGCACAACACAC       |
| <i>PcPSBR</i>        | F: AACCTGAGGAACGGGTTA           | R: AAGGATTCCAGCTAGGGTAA      |
| <i>PcPSBY</i>        | F: TACCACTCATAACCAGCCATA        | R: ATAGAATAGCAGGAGCAACG      |
| <i>PcPSB28</i>       | F: CCTACTCCCTATTCAATGGC         | R: AAGGTGAATATCGCCATAACC     |
| <i>PcCAB5</i>        | F: CACTTGGATGTGTCTTTCT          | R: CTGTACCCTTCAACGAATCC      |
| <i>PcCAB6</i>        | F: CCATTGAATTCGTTGCCATT         | R: ACCAGGATAAGCTGTTTGT       |
| <i>PcRBCMT</i>       | F: CTCTTTTGTACTGGACACGA         | R: GACCACTTGAAAGTCTCCAT      |
| <i>PcLIL3-1</i>      | F: CTGCAATGATTGGGTTCTTC         | R: TAGGGATGGAAGATGTCTCA      |
| <i>PcPSBO1</i>       | F: TCACCATTAAACAGTTGGTTG        | R: AGGGTGATTTTACCTGTTGA      |
| <i>PcPSBO2</i>       | F: AACCTTTCTGTCATGGTCAC         | R: TATTGTTTCCCATCGATCAC      |
| <i>PcLFNR</i>        | F: CTTGGAAGTGGAACTGGTAT         | R: TTTGTTTGTCTCTACTGACT      |
| <i>PcPOD42</i>       | F: CTATCTCCCAGACCACAATG         | R: CCTCACATATTGGACAGCTT      |
| <i>PcPOD47</i>       | F: CAAAAATAGGTTGAGTGACCC        | R: GTTCATAGCGTAGCCCTT        |
| <i>PcSOD[Cu-Zn]2</i> | F: TCATCACCCGAGACTCTAAT         | R: CGTTCATTATCACATGGAGC      |
| <i>PcSOD[Mn]</i>     | F: AATCTCACTCCTGTCCAAGAA        | R: TGGTCTCAACCACAAGTTTC      |
| <i>PcCYB1-2</i>      | F: GGAGGTGAAGCCATTATGAG         | R: CCAGGGTAGAAGAACACAAT      |
| <i>PcTRX</i>         | F: TATGGGGATAGATTGACGGT         | R: CTCCAAGAGAGCATCAACAT      |
| <i>PcCDSP32</i>      | F: AAGCTGATGGGAGATGTTTT         | R: CTATCATTCTCGTCACCGTT      |
| <i>PcTRXM</i>        | F: AGTGAGTACTACCACCAGAG         | R: ATCTGTGCTACTTGAACGTG      |
| <i>PcPRXQ</i>        | F: CTTTGCTTCCCACTCTTAAA         | R: ACAAAGTCTTTCCATCTGA       |
| <i>PcNHA1</i>        | F: GCTATACACACTTCAGGGAG         | R: AAGCAGATAAGCACCAAGAA      |
| <i>PcNHE2-1</i>      | F: GAGATTGCAAATGTTGACCA         | R: AGATAACAACCCCAAGTACAC     |
| <i>PcCAX3</i>        | F: GTTTGTGGTTCCACTTTGTG         | R: GTTTAAGAAAAAGCACGCCC      |
| <i>PcAVP1</i>        | F: GGATCAATACTGTCGATGTCT        | R: TGGCTCTACCTTCCATAAGT      |
| <i>PcAHA11</i>       | F: TATTTGGAGTGTC AACCTG         | R: GAGCAATGATAAAAAGCCACC     |
| <i>PcACA8</i>        | F: TGAGTTTGTGGGAAGTTCA          | R: CGATCACTTGGAGAGTTACC      |
| <i>PcACA9</i>        | F: ATGAGTAGCAGTTGTTGCTC         | R: CGAAGAATCTCGATAGGAGC      |
| <i>PcAATP</i>        | F: TGTCCTTTTCAAATGCGTTG         | R: TGGATTGTTTACATCCTGT       |
| <i>PcASD</i>         | F: ATAAAGGACAACAGCGAGTT         | R: CTTTCTTCTTCTGCCTCCTT      |
| <i>PcSOS1</i>        | F: GGTGGTCTTATGAGTTGGCCTGAA     | R: GCAGTTGGGGAGCAGGAGTTTTTC  |
| <i>PcSOS2</i>        | F: ACGACATGTGGAACCCCGAATT       | R: ACGAGTTTTAGGATTGGGATTGAGT |
| <i>PcSOS3</i>        | F: GTTCGATCTTTGGGTGTCCTTCAT     | R: GGGTCTTCGACACAAAATTCCT    |

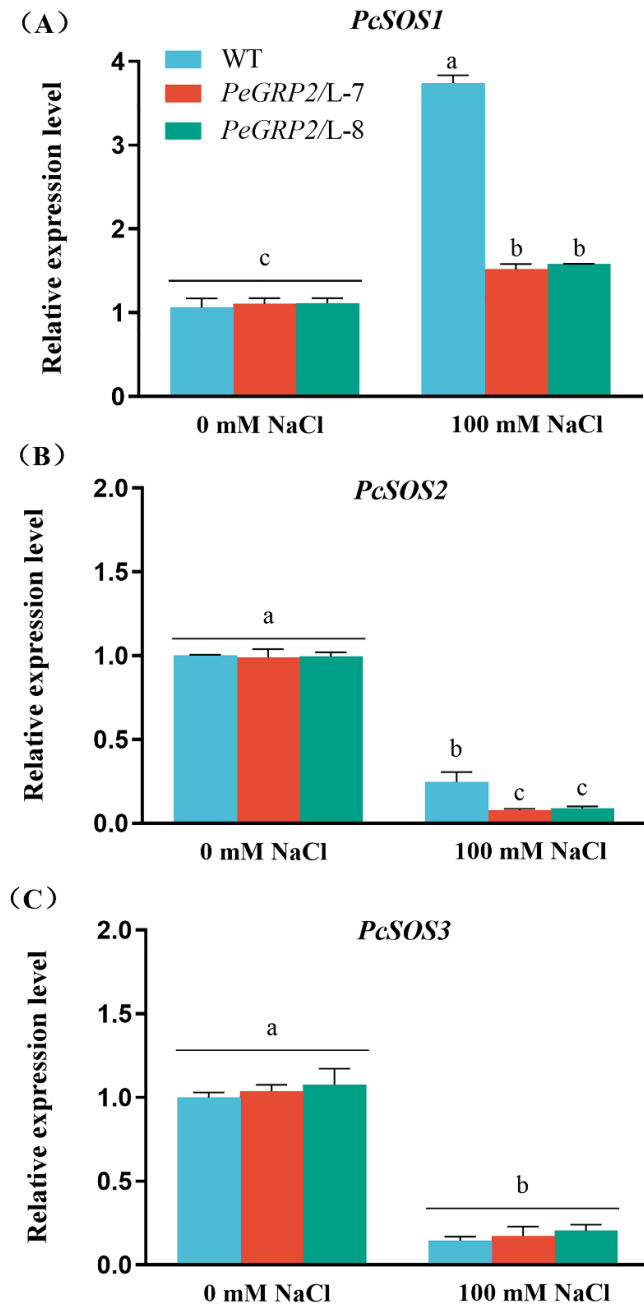

**Supplemental Figure S1.** Transcript of *PcSOS1*, *PcSOS2* and *PcSOS3* in wildtype *P. × canescens* and *PeGRP2*-overexpressed lines under long-term salt stress. The *PeGRP2*-overexpressed lines (L-7 and L-8) wildtype (WT) and *P. × canescens* were treated with NaCl saline (0 or 100 mM) for 15 days. Leaves were collected from no-salt control and salinized plants for RT-qPCR analysis. Transcripts of salt-overly-sensitive (SOS) pathway genes *PcSOS1*, *PcSOS2* and *PcSOS3*, were examined in WT and *PeGRP2*-overexpressed poplars. The primer sequences for SOS and reference genes, *PcUBQ*, are shown in

Supplementary Table S2. Data are mean  $\pm$  SE (n = 3), and different letters indicate significant difference ( $P < 0.05$ ).
